# Supplementary material for: Transcriptome Highlights Cannabinol Modulation of Mitophagy in a Parkinson’s Disease In Vitro Model
Source: MDPI journal article supplement (doi:10.3390/biom13081163), 2023-07-25
Supplement: s1 [file s1]

## Supplementary Files-Figures

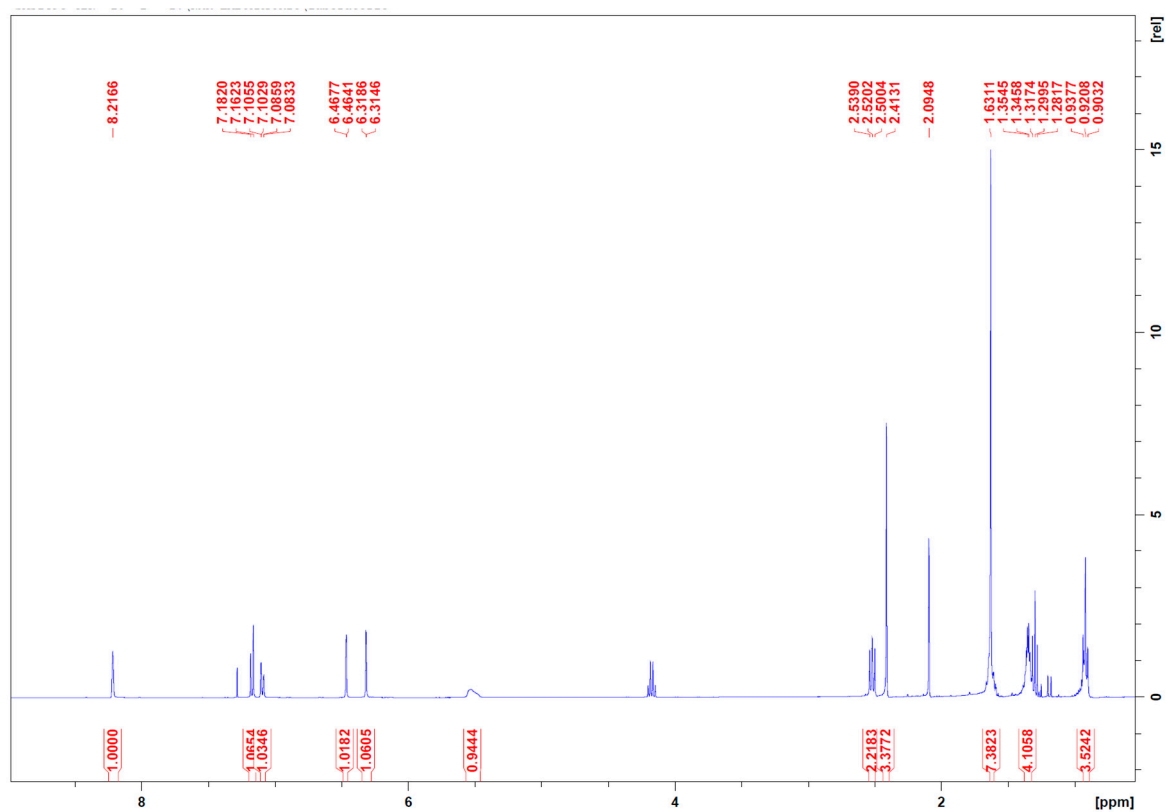

Figure S1:  $^1\text{H}$  NMR of CBN (1) in  $\text{CDCl}_3$ , 400 MHz.

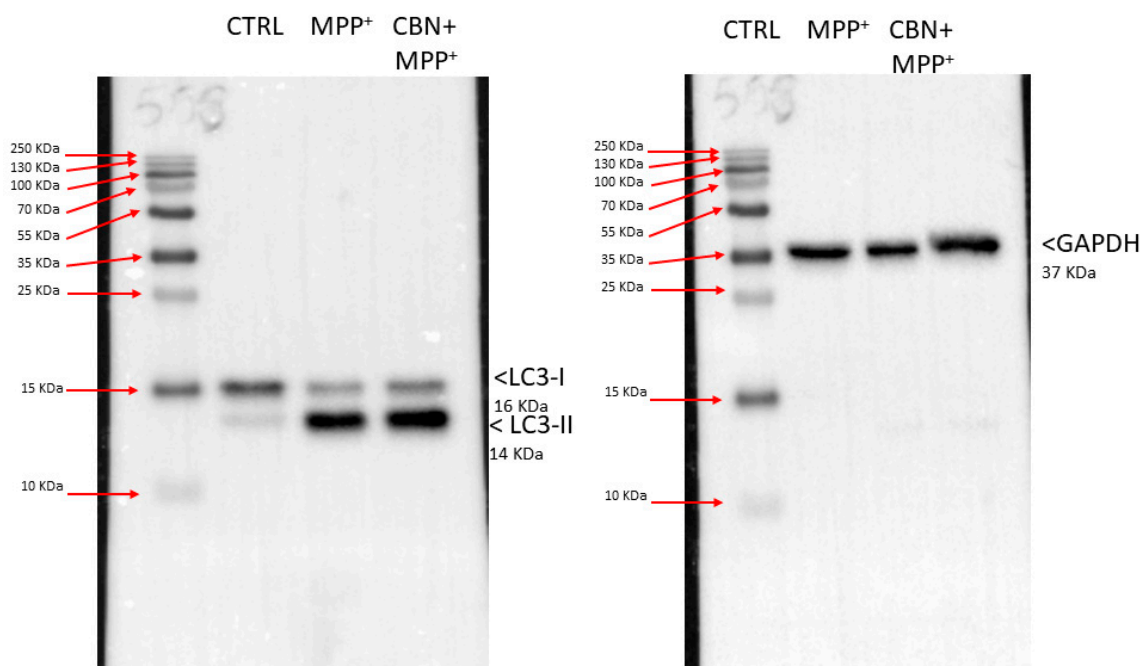

Figure S2: Uncropped blot for LC3 and GAPDH.

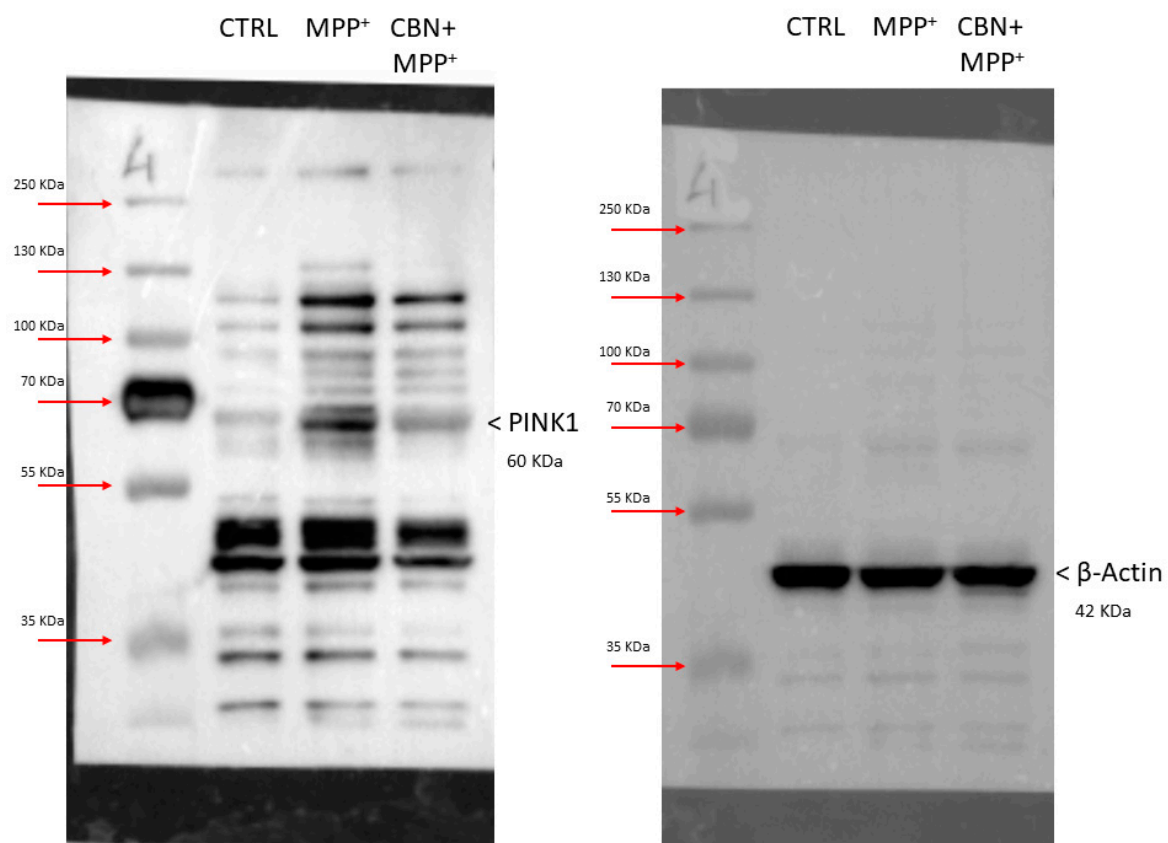

Figure S3: Uncropped blot for PINK1.

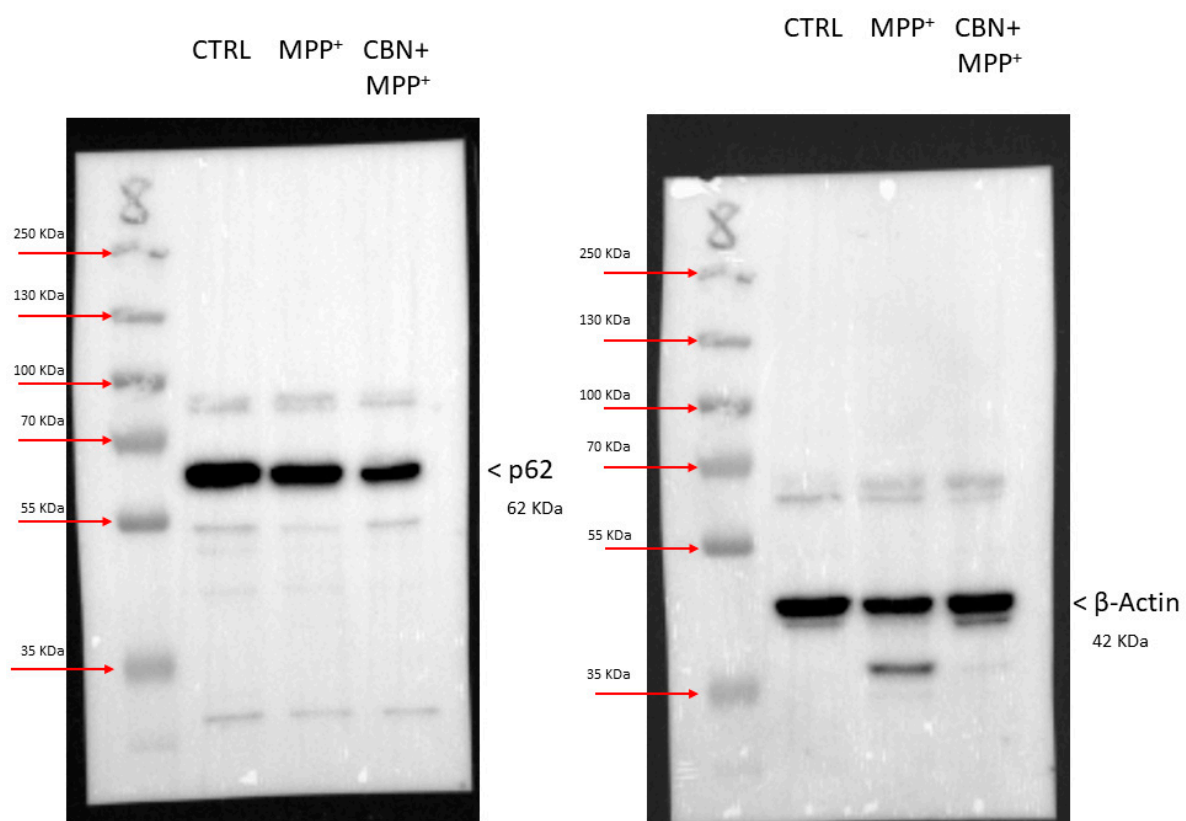

Figure S4: Uncropped blot for p62.
