# Supplementary material for: Transcriptome Highlights Cannabinol Modulation of Mitophagy in a Parkinson’s Disease In Vitro Model
Source: Biomolecules. 2023 Jul 25;13(8):1163. doi: 10.3390/biom13081163 (PMC10452113; doi:10.3390/biom13081163)
Supplement: Supplementary file 1 [file biomolecules-13-01163-s001.zip › Supplementary file excel S1.xlsx]

## Sheet: GO 0000422
	fold_change.CTRL_MPP	q.Value.CTRL_MPP	fold_cange.MPP_CBN10	q.Value.MPP_CBN10
AMBRA1	0.17	3.77e-11	-0.24	1.19e-11
ATG12	0.48	5.55e-28	-0.17	0.00606
ATG2A	0.39	2.19e-24	-0.19	0.000339
ATG3	-0.43	9.52e-38	0.16	0.000895
ATG4B	0.79	2.29e-221	-0.12	0.000296
ATG4D	-0.63	2.94e-16	0.44	1.93e-05
ATG5	-1.04	2.02e-50	0.6	1.12e-10
ATG7	-0.37	1.34e-18	0.17	0.00299
ATP5IF1	0.42	1.97e-20	-0.15	0.0174
BNIP3L	0.38	2.8e-52	-0.31	1.79e-19
CISD2	0.24	1.22e-11	-0.19	0.00018
CSNK2A2	1.16	0	-0.13	2.61e-08
CTSK	-1.72	3.06e-134	0.42	4.84e-05
CTTN	-0.43	8.32e-235	0.06	0.00319
DNM1L	0.71	0	-0.07	1.49e-06
FBXO7	1.23	0	-0.11	8.23e-11
FBXW7	0.26	7.2e-17	-0.1	0.0216
FUNDC2	0.38	9.18e-58	-0.26	4.65e-16
HAX1	0.67	0	-0.21	3.85e-26
HIF1A	-0.3	1.61e-112	0.06	0.0027
HTRA2	0.33	2.13e-25	-0.31	1.39e-12
HUWE1	-0.06	4.1e-25	0.05	6.11e-10
OPTN	2.41	0	-0.29	1.71e-45
PINK1	0.7	2.08e-65	-0.18	0.00107
RB1CC1	-0.36	2.3e-73	0.13	6.31e-06
SLC25A46	-0.26	1.01e-15	0.1	0.0438
SLC25A5	1.27	0	-0.1	7.6e-07
SQSTM1	0.96	0	-0.24	1.09e-17
SREBF2	0.38	2.04e-167	-0.04	0.0428
TAFAZZIN	1.55	0	-0.16	1.1e-12
TOMM7	1.37	0	-0.27	5.58e-32
TSC2	0.53	0	-0.1	1.79e-23
ULK1	-0.3	6.23e-16	0.18	0.000562

## Sheet: GO 0034643
	fold_change.CTRL_MPP	q.Value.CTRL_MPP	fold_cange.MPP_CBN10	q.Value.MPP_CBN10
ACTR10	-0.17	2.07e-07	0.23	1.26e-07
FEZ1	1.41	0	-0.22	3.47e-09
HIF1A	-0.3	1.61e-112	0.06	0.0027
MAP1B	0.08	6.59e-38	-0.03	8.22e-05
MGARP	2.3	3.83e-09	-4.07	0.000408
NEFL	1.46	0	-0.09	4.15e-09
OPA1	0.24	6.84e-88	-0.04	0.0196
RHOT1	0.8	7.11e-304	-0.13	3.69e-06
SPAST	-0.98	0	0.23	5.63e-13
UBB	1.14	0	-0.2	0
UCHL1	0.28	2.3e-259	-0.07	3.97e-10

## Sheet: GO 0051654
	fold_change.CTRL_MPP	q.Value.CTRL_MPP	fold_cange.MPP_CBN10	q.Value.MPP_CBN10
ACTR10	-0.17	2.07e-07	0.23	1.26e-07
FEZ1	1.41	0	-0.22	3.47e-09
HIF1A	-0.3	1.61e-112	0.06	0.0027
MAP1B	0.08	6.59e-38	-0.03	8.22e-05
MARK1	-0.3	2.43e-18	0.29	3.47e-10
MGARP	2.3	3.83e-09	-4.07	0.000408
MYO19	-0.19	9.4e-11	0.24	2e-10
NEFL	1.46	0	-0.09	4.15e-09
OPA1	0.24	6.84e-88	-0.04	0.0196
RHOT1	0.8	7.11e-304	-0.13	3.69e-06
SPAST	-0.98	0	0.23	5.63e-13
UBB	1.14	0	-0.2	0
UCHL1	0.28	2.3e-259	-0.07	3.97e-10

## Sheet: GO 0072655
	fold_change.CTRL_MPP	q.Value.CTRL_MPP	fold_cange.MPP_CBN10	q.Value.MPP_CBN10
AGK	-0.14	3.56e-05	0.17	0.00025
AIP	1.34	0	-0.15	1.12e-07
AKT1	0.28	1.29e-66	-0.12	1.48e-08
ATP5IF1	0.42	1.97e-20	-0.15	0.0174
BAP1	-0.1	3.99e-08	0.09	0.000417
BAX	1.39	2.05e-137	-0.3	6.29e-06
BNIP3L	0.38	2.8e-52	-0.31	1.79e-19
CALM3	0.61	2.15e-179	-0.24	1.89e-18
CHCHD4	0.86	4.9e-32	-0.51	3.36e-07
COX18	-0.88	4.79e-19	0.53	7.19e-05
CSNK2A2	1.16	0	-0.13	2.61e-08
DNAJC19	-0.45	4.95e-34	0.22	1.29e-05
FBXO7	1.23	0	-0.11	8.23e-11
FBXW7	0.26	7.2e-17	-0.1	0.0216
HAX1	0.67	0	-0.21	3.85e-26
HK1	0.63	0	-0.1	4.21e-18
HSP90AA1	1.79	0	-0.02	1.89e-07
HSPD1	0.54	0	-0.04	4.37e-05
HTRA2	0.33	2.13e-25	-0.31	1.39e-12
HUWE1	-0.06	4.1e-25	0.05	6.11e-10
IMMP1L	-1.62	2.83e-57	0.32	0.0447
LMAN1	0.8	0	-0.08	0.00254
MAIP1	-0.51	1.06e-08	0.32	0.0121
MGARP	2.3	3.83e-09	-4.07	0.000408
MICALL2	0.19	0.0178	-0.76	1.17e-09
NMT1	0.63	3.49e-126	-0.23	5.38e-11
NPEPPS	0.54	0	-0.07	1.53e-05
PINK1	0.7	2.08e-65	-0.18	0.00107
RAC2	3.68	4.22e-33	-1.02	3.17e-05
RALA	0.56	5.97e-91	-0.09	0.0204
SH3GLB1	0.73	9.97e-173	-0.25	3.03e-13
SREBF2	0.38	2.04e-167	-0.04	0.0428
TIMM10	-0.39	1.32e-10	0.24	0.00523
TIMM17B	0.48	2.41e-23	-0.16	0.0209
TIMM21	-0.24	0.000116	0.26	0.00183
TIMM8B	-0.26	0.00627	0.47	0.000129
TOMM7	1.37	0	-0.27	5.58e-32
TOMM70	-0.38	5.08e-43	0.13	0.00082

## Sheet:  GO 0007006
	fold_change.CTRL_MPP	q.Value.CTRL_MPP	fold_cange.MPP_CBN10	q.Value.MPP_CBN10
ADCK1	-1.85	1.33e-26	1.05	4.24e-06
AGK	-0.14	3.56e-05	0.17	0.00025
ATP5IF1	0.42	1.97e-20	-0.15	0.0174
BAX	1.39	2.05e-137	-0.3	6.29e-06
BCL2	-0.37	5.39e-07	0.24	0.0183
BNIP3L	0.38	2.8e-52	-0.31	1.79e-19
BOK	-1.02	0.000328	1.67	1.86e-07
CALM3	0.61	2.15e-179	-0.24	1.89e-18
CNP	0.18	0.000118	-0.33	3.73e-07
COX18	-0.88	4.79e-19	0.53	7.19e-05
DNAJC11	-2.6	0	0.21	0.00817
GHITM	1.02	0	-0.12	8.55e-05
HSP90AA1	1.79	0	-0.02	1.89e-07
HSPA1A	5.39	0	-0.06	1.23e-22
MAIP1	-0.51	1.06e-08	0.32	0.0121
MICOS13	0.55	6.64e-10	-0.25	0.05
NMT1	0.63	3.49e-126	-0.23	5.38e-11
NOL3	0.97	1.09e-47	-0.63	1.84e-12
OMA1	-0.56	7.98e-12	0.27	0.0222
OPA1	0.24	6.84e-88	-0.04	0.0196
PINK1	0.7	2.08e-65	-0.18	0.00107
RCC1L	-0.67	3.34e-199	0.24	2.62e-15
RHOT1	0.8	7.11e-304	-0.13	3.69e-06
SLC25A5	1.27	0	-0.1	7.6e-07
SLC35F6	-1.13	3.21e-41	0.34	0.00714
SLC9A1	-1.3	9.94e-37	0.87	3.87e-11
TAFAZZIN	1.55	0	-0.16	1.1e-12
TIMM10	-0.39	1.32e-10	0.24	0.00523
TIMM8B	-0.26	0.00627	0.47	0.000129
TMEM11	0.29	0.00173	-0.34	0.0109
TOMM70	-0.38	5.08e-43	0.13	0.00082
VDAC2	1.56	0	-0.11	6.52e-09

## Sheet: GO 0006839
	fold_change.CTRL_MPP	q.Value.CTRL_MPP	fold_cange.MPP_CBN10	q.Value.MPP_CBN10
AGK	-0.14	3.56e-05	0.17	0.00025
AIP	1.34	0	-0.15	1.12e-07
ATP5IF1	0.42	1.97e-20	-0.15	0.0174
BAP1	-0.1	3.99e-08	0.09	0.000417
BAX	1.39	2.05e-137	-0.3	6.29e-06
BCL2	-0.37	5.39e-07	0.24	0.0183
BNIP3L	0.38	2.8e-52	-0.31	1.79e-19
BOK	-1.02	0.000328	1.67	1.86e-07
CHCHD4	0.86	4.9e-32	-0.51	3.36e-07
CNP	0.18	0.000118	-0.33	3.73e-07
COX18	-0.88	4.79e-19	0.53	7.19e-05
CSNK2A2	1.16	0	-0.13	2.61e-08
DNAJC19	-0.45	4.95e-34	0.22	1.29e-05
FBXO7	1.23	0	-0.11	8.23e-11
FBXW7	0.26	7.2e-17	-0.1	0.0216
HAX1	0.67	0	-0.21	3.85e-26
HSP90AA1	1.79	0	-0.02	1.89e-07
HSPA1A	5.39	0	-0.06	1.23e-22
HSPD1	0.54	0	-0.04	4.37e-05
HTRA2	0.33	2.13e-25	-0.31	1.39e-12
HUWE1	-0.06	4.1e-25	0.05	6.11e-10
IMMP1L	-1.62	2.83e-57	0.32	0.0447
LMAN1	0.8	0	-0.08	0.00254
MAIP1	-0.51	1.06e-08	0.32	0.0121
MGARP	2.3	3.83e-09	-4.07	0.000408
MICALL2	0.19	0.0178	-0.76	1.17e-09
NMT1	0.63	3.49e-126	-0.23	5.38e-11
NOL3	0.97	1.09e-47	-0.63	1.84e-12
NPEPPS	0.54	0	-0.07	1.53e-05
PINK1	0.7	2.08e-65	-0.18	0.00107
RAC2	3.68	4.22e-33	-1.02	3.17e-05
RHOT1	0.8	7.11e-304	-0.13	3.69e-06
SH3GLB1	0.73	9.97e-173	-0.25	3.03e-13
SLC25A46	-0.26	1.01e-15	0.1	0.0438
SLC25A5	1.27	0	-0.1	7.6e-07
SLC35F6	-1.13	3.21e-41	0.34	0.00714
SLC9A1	-1.3	9.94e-37	0.87	3.87e-11
SREBF2	0.38	2.04e-167	-0.04	0.0428
STARD3	0.83	2.08e-247	-0.21	6.71e-12
TIMM10	-0.39	1.32e-10	0.24	0.00523
TIMM17B	0.48	2.41e-23	-0.16	0.0209
TIMM21	-0.24	0.000116	0.26	0.00183
TIMM8B	-0.26	0.00627	0.47	0.000129
TOMM7	1.37	0	-0.27	5.58e-32
TOMM70	-0.38	5.08e-43	0.13	0.00082
VDAC2	1.56	0	-0.11	6.52e-09
VPS35	-0.3	3.82e-82	0.13	1.63e-09

## Sheet: GO 0061726
	fold_change.CTRL_MPP	q.Value.CTRL_MPP	fold_cange.MPP_CBN10	q.Value.MPP_CBN10
AMBRA1	0.17	3.77e-11	-0.24	1.19e-11
ATG12	0.48	5.55e-28	-0.17	0.00606
ATG2A	0.39	2.19e-24	-0.19	0.000339
ATG3	-0.43	9.52e-38	0.16	0.000895
ATG4B	0.79	2.29e-221	-0.12	0.000296
ATG4D	-0.63	2.94e-16	0.44	1.93e-05
ATG5	-1.04	2.02e-50	0.6	1.12e-10
ATG7	-0.37	1.34e-18	0.17	0.00299
ATP5IF1	0.42	1.97e-20	-0.15	0.0174
BNIP3L	0.38	2.8e-52	-0.31	1.79e-19
CISD2	0.24	1.22e-11	-0.19	0.00018
CSNK2A2	1.16	0	-0.13	2.61e-08
CTSK	-1.72	3.06e-134	0.42	4.84e-05
CTTN	-0.43	8.32e-235	0.06	0.00319
DNM1L	0.71	0	-0.07	1.49e-06
FBXO7	1.23	0	-0.11	8.23e-11
FBXW7	0.26	7.2e-17	-0.1	0.0216
FUNDC2	0.38	9.18e-58	-0.26	4.65e-16
HAX1	0.67	0	-0.21	3.85e-26
HIF1A	-0.3	1.61e-112	0.06	0.0027
HTRA2	0.33	2.13e-25	-0.31	1.39e-12
HUWE1	-0.06	4.1e-25	0.05	6.11e-10
OPTN	2.41	0	-0.29	1.71e-45
PINK1	0.7	2.08e-65	-0.18	0.00107
RB1CC1	-0.36	2.3e-73	0.13	6.31e-06
SLC25A46	-0.26	1.01e-15	0.1	0.0438
SLC25A5	1.27	0	-0.1	7.6e-07
SQSTM1	0.96	0	-0.24	1.09e-17
SREBF2	0.38	2.04e-167	-0.04	0.0428
TAFAZZIN	1.55	0	-0.16	1.1e-12
TOMM7	1.37	0	-0.27	5.58e-32
TSC2	0.53	0	-0.1	1.79e-23
ULK1	-0.3	6.23e-16	0.18	0.000562

## Sheet: GO 0047497
	fold_change.CTRL_MPP	q.Value.CTRL_MPP	fold_cange.MPP_CBN10	q.Value.MPP_CBN10
ACTR10	-0.17	2.07e-07	0.23	1.26e-07
FEZ1	1.41	0	-0.22	3.47e-09
HIF1A	-0.3	1.61e-112	0.06	0.0027
MAP1B	0.08	6.59e-38	-0.03	8.22e-05
MGARP	2.3	3.83e-09	-4.07	0.000408
NEFL	1.46	0	-0.09	4.15e-09
OPA1	0.24	6.84e-88	-0.04	0.0196
RHOT1	0.8	7.11e-304	-0.13	3.69e-06
SPAST	-0.98	0	0.23	5.63e-13
UBB	1.14	0	-0.2	0
UCHL1	0.28	2.3e-259	-0.07	3.97e-10

## Sheet: GO 0010823
	fold_change.CTRL_MPP	q.Value.CTRL_MPP	fold_cange.MPP_CBN10	q.Value.MPP_CBN10
ADCK1	-1.85	1.33e-26	1.05	4.24e-06
AKT1	0.28	1.29e-66	-0.12	1.48e-08
ARRB2	0.49	1.2e-77	-0.1	0.00544
BOK	-1.02	0.000328	1.67	1.86e-07
CLU	1.81	0	-0.32	2.01e-16
GHITM	1.02	0	-0.12	8.55e-05
HSPA1A	5.39	0	-0.06	1.23e-22
HUWE1	-0.06	4.1e-25	0.05	6.11e-10
LMNA	0.6	2.26e-220	-0.06	0.0193
NOL3	0.97	1.09e-47	-0.63	1.84e-12
OMA1	-0.56	7.98e-12	0.27	0.0222
OPA1	0.24	6.84e-88	-0.04	0.0196
PINK1	0.7	2.08e-65	-0.18	0.00107
PRELID1	0.64	0	-0.08	1.63e-05
SLC25A5	1.27	0	-0.1	7.6e-07
SLC35F6	-1.13	3.21e-41	0.34	0.00714
TSC2	0.53	0	-0.1	1.79e-23
VAT1	1.82	0	-0.06	0.0127

## Sheet: GO 1903749
	fold_change.CTRL_MPP	q.Value.CTRL_MPP	fold_cange.MPP_CBN10	q.Value.MPP_CBN10
BAP1	-0.1	3.99e-08	0.09	0.000417
CSNK2A2	1.16	0	-0.13	2.61e-08
FBXW7	0.26	7.2e-17	-0.1	0.0216
HTRA2	0.33	2.13e-25	-0.31	1.39e-12
HUWE1	-0.06	4.1e-25	0.05	6.11e-10
MICALL2	0.19	0.0178	-0.76	1.17e-09
NMT1	0.63	3.49e-126	-0.23	5.38e-11
NPEPPS	0.54	0	-0.07	1.53e-05
PINK1	0.7	2.08e-65	-0.18	0.00107
RAC2	3.68	4.22e-33	-1.02	3.17e-05
SH3GLB1	0.73	9.97e-173	-0.25	3.03e-13
SREBF2	0.38	2.04e-167	-0.04	0.0428
TOMM7	1.37	0	-0.27	5.58e-32

[truncated: 7 more sheets: GO 1903955, GO 0070585, GO 0006626, GO 1903747, GO 0010821, GO 1903214, GO 0008535]
